# Supplementary material for: In vitro DNA adduct profiling to mechanistically link red meat consumption to colon cancer promotion
Source: Royal Society of Chemistry journal article supplement (doi:10.1039/c6tx00079g), 2016-01-01
Supplement: c6tx00079g1.pdf [file c6tx00079g1.pdf]

**Supplementary information table 1. Significantly higher levels ( $p < 0.05$  or  $p < 0.10$  (\*)) of putatively identified DNA adducts (not relevant to hypothesis) in pre-colonic meat digests (T0) after two sample differential analysis by means of Sieve™ database lookup**

| Discriminating for                | DNA adduct                                                      | RT                    |      |
|-----------------------------------|-----------------------------------------------------------------|-----------------------|------|
| Chicken vs. Beef                  | Carboxy-G (*)                                                   | 0.81                  |      |
|                                   | Heptenaetheno-G                                                 | 4.01                  |      |
|                                   | Hydroxy-A                                                       | 3.22                  |      |
|                                   | Hydroxy-A                                                       | 3.48                  |      |
|                                   | Hydroxy-A (*)                                                   | 2.64                  |      |
|                                   | Hydroxy-PhIP-G (Hydroxy-aminomethylphenylimidazopyridine-G) (*) | 3.75                  |      |
|                                   | Hydroxynonenal-A                                                | 2.65                  |      |
|                                   | Hydroxynonenal-A                                                | 2.84                  |      |
|                                   | IQ-G (Aminomethylimidazoquinolone-G)                            | 1.29                  |      |
|                                   | M1-A (Malondialdehyde dimer guanine DNA adduct)                 | 0.86                  |      |
|                                   | M1-G (Pyrimidopurinone)                                         | 4.36                  |      |
|                                   | M3-C (Diformyldihydromethano-oxazocinyloxopyrimidine)           | 1.05                  |      |
|                                   | MeIQ-G (Aminodimethylimidazoquinolone-G)                        | 5.08                  |      |
|                                   | Methoxymethyl-C                                                 | 0.77                  |      |
|                                   | Methoxymethyl-T                                                 | 3.62                  |      |
|                                   | Methyl-A (*)                                                    | 1.13                  |      |
|                                   | Methyl-C                                                        | 1.39                  |      |
|                                   | Methyl-C                                                        | 2.68                  |      |
|                                   | Methyl-C (*)                                                    | 3.80                  |      |
|                                   | Methyl-T or Ethyl-U                                             | 3.16                  |      |
|                                   | Methyl-T or Ethyl-U                                             | 3.84                  |      |
|                                   | Methyl-T or Ethyl-U (*)                                         | 1.17                  |      |
|                                   | PhIP-G (Aminomethylphenylimidazopyridine-G)                     | 1.41                  |      |
|                                   | ST-G (Sterigmatocystin-G)                                       | 1.72                  |      |
|                                   | Tetramethyl-C                                                   | 0.86                  |      |
|                                   | Chicken + CaCO <sub>3</sub> vs. Chicken                         | 1,N6-etheno-A         | 1.54 |
|                                   |                                                                 | Dimethyl-T or Ethyl-T | 1.02 |
|                                   |                                                                 | Dimethyl-T or Ethyl-T | 1.04 |
|                                   |                                                                 | Dimethyl-T or Ethyl-T | 1.27 |
|                                   |                                                                 | Dimethyl-T or Ethyl-T | 2.62 |
|                                   |                                                                 | Dimethyl-T or Ethyl-T | 3.80 |
|                                   |                                                                 | Dimethyl-T or Ethyl-T | 4.11 |
|                                   |                                                                 | Dimethyl-T or Ethyl-T | 4.23 |
| Methoxymethyl-C                   |                                                                 | 3.05                  |      |
| Methoxymethyl-T                   |                                                                 | 2.05                  |      |
| Methyl-T or Ethyl-U               |                                                                 | 2.10                  |      |
| Methyl-T or Ethyl-U               |                                                                 | 2.50                  |      |
| Nitro-C                           |                                                                 | 3.29                  |      |
| Beef + CaCO <sub>3</sub> vs. Beef |                                                                 | Dimethyl-T or Ethyl-T | 0.71 |
|                                   |                                                                 | Dimethyl-T or Ethyl-T | 1.02 |
|                                   | Dimethyl-T or Ethyl-T                                           | 1.28                  |      |
|                                   | Dimethyl-T or Ethyl-T                                           | 1.62                  |      |
|                                   | Dimethyl-T or Ethyl-T                                           | 2.87                  |      |
|                                   | Dimethyl-T or Ethyl-T                                           | 2.70                  |      |
|                                   | Dimethyl-T or Ethyl-T                                           | 4.22                  |      |
|                                   | Hydroxynonenal-C                                                | 1.30                  |      |
|                                   | Hydroxymethylhydantion (*)                                      | 2.80                  |      |
|                                   | Diformyldihydromethano-oxazocinyloxopyrimidine (M3-C)           | 3.93                  |      |
|                                   | Methoxymethyl-T                                                 | 2.10                  |      |
|                                   | Methyl-C (*)                                                    | 2.89                  |      |
|                                   | Methyl-T or Ethyl-U                                             | 2.51                  |      |
|                                   | Methyl-U                                                        | 2.42                  |      |
|                                   | Methyl-U                                                        | 3.90                  |      |
|                                   | Nitro-C                                                         | 2.76                  |      |
|                                   | Nitro-C                                                         | 3.29                  |      |
