# Supplementary material for: In vitro DNA adduct profiling to mechanistically link red meat consumption to colon cancer promotion
Source: Royal Society of Chemistry journal article supplement (doi:10.1039/c6tx00079g), 2016-01-01
Supplement: c6tx00079g2.pdf [file c6tx00079g2.pdf]

**Supplementary information table 2. Malondialdehyde concentrations in meat digests**

| ID          | Meat type                       | Biological replicate            | T0 MDA conc. ( $\mu \pm$ SD) (nmol/mL) |                                   | T48 MDA conc. ( $\mu \pm$ SD) (nmol/mL) |                                   |
|-------------|---------------------------------|---------------------------------|----------------------------------------|-----------------------------------|-----------------------------------------|-----------------------------------|
|             |                                 |                                 | No added CaCO <sub>3</sub>             | Added CaCO <sub>3</sub>           | No added CaCO <sub>3</sub>              | Added CaCO <sub>3</sub>           |
| P1          | Chicken                         | 1                               | 29.17 $\pm$ 0.259                      | 23.59 $\pm$ 0.133                 | 25.4 $\pm$ 1.63                         | 20.7 $\pm$ 2.43                   |
|             |                                 | 2                               | 15.1 $\pm$ 1.88                        | 14.1 $\pm$ 0.60                   | 17.9 $\pm$ 1.11                         | 16.1 $\pm$ 1.13                   |
|             |                                 | 3                               | 27.2 $\pm$ 0.87                        | 22 $\pm$ 3.1                      | 25.0 $\pm$ 1.96                         | 22.0 $\pm$ 0.41                   |
|             |                                 | <b>Mean</b>                     | <b>24 <math>\pm</math> 13.5</b>        | <b>20 <math>\pm</math> 9.1</b>    | <b>23 <math>\pm</math> 8.7</b>          | <b>20 <math>\pm</math> 4.8</b>    |
|             | Beef                            | 1                               | 48.1 $\pm$ 2.23                        | 32.4 $\pm$ 0.47                   | 41.1 $\pm$ 1.60                         | 27 $\pm$ 3.8                      |
|             |                                 | 2                               | 17.7 $\pm$ 1.59                        | 21.9 $\pm$ 2.16                   | 17.8 $\pm$ 0.92                         | 17.86 $\pm$ 0.071                 |
|             |                                 | 3                               | 51.2 $\pm$ 2.77                        | 45 $\pm$ 4.1                      | 33 $\pm$ 3.7                            | 37.4                              |
| <b>Mean</b> | <b>39 <math>\pm</math> 16.9</b> | <b>33 <math>\pm</math> 10.0</b> | <b>31 <math>\pm</math> 10.0</b>        | <b>24.5 <math>\pm</math> 7.04</b> |                                         |                                   |
| P2          | Chicken                         | 1                               | 22.3 $\pm$ 0.87                        | 16.7 $\pm$ 0.78                   | 22.5 $\pm$ 1.33                         | 15.6 $\pm$ 0.91                   |
|             |                                 | 2                               | 28.6 $\pm$ 2.02                        | 26.9 $\pm$ 0.75                   | 17.2 $\pm$ 0.30                         | 14.8 $\pm$ 0.58                   |
|             |                                 | 3                               | 25.0 $\pm$ 1.34                        | 24.1 $\pm$ 0.80                   | 15.5 $\pm$ 0.70                         | 15.5 $\pm$ 0.32                   |
|             |                                 | <b>Mean</b>                     | <b>25 <math>\pm</math> 5.8</b>         | <b>23 <math>\pm</math> 6.8</b>    | <b>18 <math>\pm</math> 3.9</b>          | <b>15.3 <math>\pm</math> 2.47</b> |
|             | Beef                            | 1                               | 22.8 $\pm$ 0.60                        | 24 $\pm$ 3.6                      | 26.3 $\pm$ 1.46                         | 19.7 $\pm$ 1.26                   |
|             |                                 | 2                               | 35 $\pm$ 3.9                           | 36.62 $\pm$ 0.146                 | 19.5 $\pm$ 1.23                         | 18.7 $\pm$ 0.69                   |
|             |                                 | 3                               | 29.6 $\pm$ 0.98                        | 32.87 $\pm$ 0.283                 | 18.41 $\pm$ 0.215                       | 21.7 $\pm$ 0.89                   |
| <b>Mean</b> | <b>29 <math>\pm</math> 5.1</b>  | <b>31 <math>\pm</math> 7.0</b>  | <b>21 <math>\pm</math> 4.4</b>         | <b>20.1 <math>\pm</math> 2.79</b> |                                         |                                   |
